# Supplementary material
Source: Research Square preprint supplement (doi:10.21203/rs.3.rs-9069496/v1)
Supplement: Supplementary file 1 [file 8a2a5d0c74c16ad32f55b0d0.xlsx]

## Sheet: grain size
#1		#2		#3		#4		#5		#6		#7		#8		average
grain size(mm)	percentage	grain size(mm)	percentage	grain size(mm)	percentage	grain size(mm)	percentage	grain size(mm)	percentage	grain size(mm)	percentage	grain size(mm)	percentage	grain size(mm)	percentage	grain size(mm)	percentage
0.61225	9.4929	0.324635	9.39604	0.197324	9.39726	0.198124	9.44136	0.143685	9.34883	0.133674	9.41389	0.13313	9.3246	0.118504	9.4018	0.232666	9.40209
5.26511	19.6157	0.96734	19.6294	1.28127	19.6425	0.607148	19.5766	0.41293	19.5017	0.412959	19.5921	0.245037	19.5999	0.230702	19.5261	1.17781	19.5855
7.95941	29.7644	3.00041	29.8065	5.09751	29.8416	2.35805	29.7823	1.65625	29.8342	1.92145	29.7934	0.502639	29.8455	0.940315	29.8542	2.9295	29.8152
12.0329	39.9582	9.1947	39.9417	9.72622	39.9263	5.43455	40.0862	4.91531	40.0234	5.43418	39.9958	1.12633	40.1572	2.8132	40.0864	6.33467	40.0219
17.7527	49.7518	35.9834	49.6028	15.676	49.8312	9.99759	49.6836	7.79489	49.752	9.26376	49.7498	3.19694	49.8162	5.47518	49.8491	13.1426	49.7546
26.0873	59.5918	53.9491	59.4373	25.1608	59.5565	21.4278	59.5554	13.5041	59.5919	17.1823	59.5709	6.50359	59.7023	7.60602	59.7045	21.4276	59.5888
38.335	69.4317	61.071	69.3489	39.748	69.5122	45.739	69.338	23.6792	69.4737	26.817	69.4395	11.6811	69.4871	10.7804	69.5544	32.2313	69.4482
53.6743	79.0589	67.2082	79.0875	56.783	79.1791	61.0334	79.0688	38.9329	79.1924	38.4669	79.1957	25.1351	79.2675	16.6228	79.3359	44.7321	79.1732
66.6252	88.7192	74.8531	88.7324	67.1645	88.7622	70.1942	88.7049	58.3612	88.8008	48.1332	88.8538	48.7164	88.8505	30.2138	88.9366	58.0327	88.795
81.6997	98.202	81.6912	98.0664	82.3526	98.1094	81.6884	98.0212	81.6997	98.202	81.6941	98.1116	82.0255	98.1557	81.6969	98.1568	81.8185	98.1282

## Sheet: Water level storage curve
capacity of reservoir(×108m3)	Relative water level(m)	absolute elevation(m)
0.382913	22.7536	2207.75	3.82913e+07
0.678163	25.0351	2210.04	6.78163e+07
1.276	28.3728	2213.37	1.276e+08
1.88638	31.4586	2216.46	1.88638e+08
2.69574	34.4796	2219.48	2.69574e+08
3.39609	37.2803	2222.28	3.39609e+08
4.5011	40.6723	2225.67	4.5011e+08
5.59422	44.2081	2229.21	5.59422e+08
6.72216	47.4568	2232.46	6.72216e+08
8.22125	51.3677	2236.37	8.22125e+08
9.92516	56.079	2241.08	9.92516e+08
11.9697	61.0188	2246.02	1.19697e+09
14.2208	66.4707	2251.47	1.42208e+09
16.5282	71.7444	2256.74	1.65282e+09
18.9017	77.0205	2262.02	1.89017e+09
22.9116	85.3833	2270.38	2.29116e+09

## Sheet: hydrologic process line
Time of breach(h)		discharge of breachQ(m3/s)	modified dischargeQ(m3/s)			calculate					Time of breach(h)	discharge of breachQ(m3/s)
0.13587		-1.21177	1272.36	1704.96	8.15217	1704.96	40.7609	0	1704		0	1705
0.815217	0.679348	6011.28	7284.85	9761.7	48.913	9761.7	61.9565	0.083	2000		1	10000
1.84783	1.03261	7504.79	8778.36	11763	110.87	11763	57.0652	0.166	3500		2	14000
2.79891	0.951087	20203.2	21476.8	28778.9	167.935	28778.9	30.9783	0.249	4000		3	35000
3.31522	0.516304	34077.1	35350.6	47369.8	198.913	47369.8		0.332	4500		4	52500
3.77717		34573.6	35847.1	48035.2	226.63	48035.2		0.415	5000		5	60000
4.29348		42594.6	43868.1	58783.3		58783.3		0.498	5500		6	115000
4.75543		42087.8	43361.3	58104.2		58104.2		0.581	6000		7	125754
5.32609		49773.7	51047.3	68403.3		68403.3		0.664	6500		8	100000
5.78804		76190	77463.5	103801		103801		0.747	7000		9	80000
6.22283		92573.1	93846.6	125754		125754		0.83	7500		10	55000
6.7663		91730.9	93004.5	124626		124626		0.913	8000		11	40000
7.28261		89718.4	90992	121929		121929		0.996	9000		12	35000
7.77174		78007.3	79280.9	106236		106236		1.079	9500		13	30000
8.2337		68637.6	69911.2	93681		93681		1.162	10000		14	22500
8.80435		62109.5	63383.1	84933.3		84933.3		1.245	11000		15	15000
9.29348		43542.2	44815.8	60053.1		60053.1		1.328	11500		16	11000
9.75543		43704.3	44977.8	60270.3		60270.3		1.411	12000		17	9800
10.2717		33832.3	35105.8	47041.8		47041.8		1.494	15000		18	7500
10.7337		32489.3	33762.9	45242.3		45242.3		1.577	16000		19	7300
11.3043		24957.9	26231.5	35150.2		35150.2		1.66	18000		20	4500
11.7663		23949.4	25223	33798.8		33798.8		1.743	18500		21	4400
12.2283		17924.2	19197.7	25725		25725		1.826	19000		22	3000
12.7989		19255.6	20529.2	27509.1		27509.1		1.909	20000		23	2000
13.288		18079.6	19353.2	25933.2		25933.2		1.992	20156.5		24	500
13.8043		15732.7	17006.3	22788.4		22788.4		2.075	21670.2		25	0
14.2935		13887.8	15161.3	20316.2		20316.2		2.158	23175.6
14.8098		11039.2	12312.8	16499.1		16499.1		2.241	24667
15.2446		8693.23	9966.8	13355.5		13355.5		2.324	26139.5
16.3043		6507.5	7781.07	10426.6		10426.6		2.407	27588.7
17.2826		5326.03	6599.6	8843.46		8843.46		2.49	29010.9
18.288		4144.25	5417.82	7259.88		7259.88		2.573	30403
19.2391		3297.53	4571.09	6125.27		6125.27		2.656	31762.5
20.2446		1781.3	3054.87	4093.52		4093.52		2.739	33087.7
21.25		1435.64	2709.21	3630.34		3630.34		2.822	34377.2
22.2283		755.841	2029.41	2719.41		2719.41		2.905	35630.5
23.2609		-259.016	1014.55	1359.5		1359.5		2.988	36847.8
24.2663		-1273.57	0	0		378		3.071	38029.5
				0		378		3.154	39177.2
				0		378		3.237	40292.6
				0		378		3.32	41378.4
				0		378		3.403	42437.8
				0		378		3.486	43474.5
				0		378		3.569	44493.2
				0		378		3.652	45498.7
				0		378		3.735	46496.9
				0		378		3.818	47494.1
				0		378		3.901	48497.2
				0		378		3.984	49513.9
				0		378		4.067	50552.3
				0		378		4.15	51621.4
				0		378		4.233	52730.6
				0		378		4.316	53890.1
				0		378		4.399	55110.5
				0		378		4.482	56403.3
				0		378		4.565	57780.5
				0		378		4.648	59254.6
				0		378		4.731	60839
				0		378		4.814	62547.5
				0		378		4.897	64394.7
				0		378		4.98	66395.6
				0		378		5.063	68566.2
				0		378		5.146	70922.7
				0		378		5.229	73482.2
				0		378		5.312	76262.4
				0		378		5.395	79281.5
				0		378		5.478	82558.6
				0		378		5.561	86113
				0		378		5.644	89965.1
				0		378		5.727	94135.5
				0		378		5.81	98645.9
				0		378		5.893	103518
				0		378		5.976	108775
				0		378		6.059	114440
				0		378		6.142	120536
				0		378		6.225	127089
				0		378		6.308	126700
				0		378		6.391	126500
				0		378		6.474	126000
				0		378		6.557	125000
				0		378		6.64	124000
				0		378		6.723	124000
				0		378		6.806	123000
				0		378		6.889	122800
				0		378		6.972	125000
				0		378		7.055	123307
				0		378		7.138	120702
				0		378		7.221	118143
				0		378		7.304	115630
				0		378		7.387	113164
				0		378		7.47	110742
				0		378		7.553	108365
				0		378		7.636	106032
				0		378		7.719	103742
				0		378		7.802	101495
				0		378		7.885	99290.8
				0		378		7.968	97127.9
				0		378		8.051	95006.2
				0		378		8.134	92925.1
				0		378		8.217	90884
				0		378		8.3	88882.3
				0		378		8.383	86919.6
				0		378		8.466	84995.3
				0		378		8.549	83108.9
				0		378		8.632	81259.7
				0		378		8.715	79447.4
				0		378		8.798	77671.2
				0		378		8.881	75930.9
				0		378		8.964	74225.7
				0		378		9.047	72555.3
				0		378		9.13	70919
				0		378		9.213	69316.4
				0		378		9.296	67747
				0		378		9.379	66210.2
				0		378		9.462	64705.7
				0		378		9.545	63232.8
				0		378		9.628	61791.1
				0		378		9.711	60380.1
				0		378		9.794	58999.4
				0		378		9.877	57648.4
				0		378		9.96	56326.7
				0		378		10.043	55033.7
				0		378		10.126	53769.2
				0		378		10.209	52532.5
				0		378		10.292	51323.2
				0		378		10.375	50140.9
				0		378		10.458	48985.1
				0		378		10.541	47855.4
				0		378		10.624	46751.3
				0		378		10.707	45672.4
				0		378		10.79	44618.3
				0		378		10.873	43588.5
				0		378		10.956	42582.5
				0		378		11.039	41600
				0		378		11.122	40640.6
				0		378		11.205	39703.8
				0		378		11.288	38789.2
				0		378		11.371	37896.4
				0		378		11.454	37025.1
				0		378		11.537	36174.7
				0		378		11.62	35344.9
				0		378		11.703	34535.4
				0		378		11.786	33745.6
				0		378		11.869	32975.3
				0		378		11.952	32224.1
				0		378		12.035	31491.5
				0		378		12.118	30777.2
				0		378		12.201	30080.9
				0		378		12.284	29402.1
				0		378		12.367	28740.5
				0		378		12.45	28095.8
				0		378		12.533	27467.5
				0		378		12.616	26855.3
				0		378		12.699	26259
				0		378		12.782	25678.1
				0		378		12.865	25112.3
				0		378		12.948	24561.2
				0		378		13.031	24024.6
				0		378		13.114	23502.1
				0		378		13.197	22993.3
				0		378		13.28	22498
				0		378		13.363	22015.9
				0		378		13.446	21546.6
				0		378		13.529	21089.7
				0		378		13.612	20645.1
				0		378		13.695	20212.4
				0		378		13.778	19791.3
				0		378		13.861	19381.5
				0		378		13.944	18982.8
				0		378		14.027	18594.8
				0		378		14.11	18217.2
				0		378		14.193	17849.8
				0		378		14.276	17492.3
				0		378		14.359	17144.4
				0		378		14.442	16805.9
				0		378		14.525	16476.5
				0		378		14.608	16155.9
				0		378		14.691	15843.8
				0		378		14.774	15540.1
				0		378		14.857	15244.5
				0		378		14.94	14956.7
				0		378		15.023	14676.5
				0		378		15.106	14403.7
				0		378		15.189	14138
				0		378		15.272	13879.1
				0		378		15.355	13626.9
				0		378		15.438	13381.2
				0		378		15.521	13141.7
				0		378		15.604	12908.2
				0		378		15.687	12680.5
				0		378		15.77	12458.3
				0		378		15.853	12241.6
				0		378		15.936	12030
				0		378		16.019	11823.5
				0		378		16.102	11621.7
				0		378		16.185	11424.6
				0		378		16.268	11231.9
				0		378		16.351	11043.4
				0		378		16.434	10859
				0		378		16.517	10678.5
				0		378		16.6	10501.7
				0		378		16.683	10328.5
				0		378		16.766	10158.7
				0		378		16.849	9992.16
				0		378		16.932	9828.7
				0		378		17.015	9668.18
				0		378		17.098	9510.47
				0		378		17.181	9355.4
				0		378		17.264	9202.86
				0		378		17.347	9052.7
				0		378		17.43	8904.79
				0		378		17.513	8759
				0		378		17.596	8615.22
				0		378		17.679	8473.32
				0		378		17.762	8333.19
				0		378		17.845	8194.71
				0		378		17.928	8057.79
				0		378		18.011	7922.3
				0		378		18.094	7788.16
				0		378		18.177	7655.27
				0		378		18.26	7523.54
				0		378		18.343	7392.87
				0		378		18.426	7263.18
				0		378		18.509	7134.4
				0		378		18.592	7006.43
				0		378		18.675	6879.22
				0		378		18.758	6752.69
				0		378		18.841	6626.77
				0		378		18.924	6501.4
				0		378		19.007	6376.53
				0		378		19.09	6252.09
				0		378		19.173	6128.05
				0		378		19.256	6004.35
				0		378		19.339	5880.94
				0		378		19.422	5757.8
				0		378		19.505	5634.88
				0		378		19.588	5512.16
				0		378		19.671	5389.6
				0		378		19.754	5267.18
				0		378		19.837	5144.88
				0		378		19.92	5022.69
				0		378		20.003	4900.59
				0		378		20.086	4778.57
				0		378		20.169	4656.64
				0		378		20.252	4534.78
				0		378		20.335	4413
				0		378		20.418	4291.31
				0		378		20.501	4169.71
				0		378		20.584	4048.23
				0		378		20.667	3926.88
				0		378		20.75	3805.68
				0		378		20.833	3684.66
				0		378		20.916	3563.84
				0		378		20.999	3443.26
				0		378		21.082	3322.96
				0		378		21.165	3202.98
				0		378		21.248	3083.36
				0		378		21.331	2964.16
				0		378		21.414	2845.41
				0		378		21.497	2727.19
				0		378		21.58	2609.54
				0		378		21.663	2492.54
				0		378		21.746	2376.25
				0		378		21.829	2260.74
				0		378		21.912	2146.09
				0		378		21.995	2032.37
				0		378		22.078	1919.68
				0		378		22.161	1808.09
				0		378		22.244	1697.69
				0		378		22.327	1588.59
				0		378		22.41	1480.87
				0		378		22.493	1374.65
				0		378		22.576	1270.02
				0		378		22.659	1167.1
				0		378		22.742	1065.99
				0		378		22.825	966.824
				0		378		22.908	869.712
				0		378		22.991	774.782
				0		378		23.074	682.162
				0		378		23.157	591.985
				0		378		23.24	504.386
				0		378		23.323	419.506
				0		378		23.406	337.488
				0		378		23.489	258.481
				0		378		23.572	182.635
				0		378		23.655	110.106
				0		378		23.738	41.0524
				0		378		23.821	40
				0		378		23.904	30
				0		378		23.987	20
				0		378		24.07	0
				0		378
				0		378
				0		378
				0		378
				0		378
				0		378
				0		378
				0		378
				0		378
				0		378
				0		378
				0		378
				0		378
				0		378
				0		378
				0		378
				0		378
				0		378
				0		378
				0		378
				0		378
				0		378
				0		378
				0		378
				0		378
				0		378
				0		378
				0		378
				0		378
				0		378
				0		378
				0		378
				0		378
				0		378
				0		378
				0		378
				0		378
				0		378
				0		378
				0		378
				0		378
				0		378
				0		378
				0		378
				0		378
				0		378
				0		378
				0		378
				0		378
				0		378
				0		378
				0		378
				0		378
				0		378
				0		378
				0		378
				0		378
				0		378
				0		378
				0		378
				0		378
				0		378
				0		378
				0		378
				0		378
				0		378
				0		378
				0		378
				0		378
				0		378
				0		378
				0		378
				0		378
				0		378
				0		378
				0		378
				0		378
				0		378
				0		378
				0		378
				0		378
				0		378
				0		378
				0		378
				0		378
				0		378
				0		378
				0		378
				0		378
				0		378
				0		378
				0		378
				0		378
				0		378
				0		378
				0		378
				0		378
				0		378
				0		378
				0		378
				0		378
				0		378
				0		378
				0		378
				0		378
				0		378
				0		378
				0		378
				0		378
				0		378
				0		378
				0		378
				0		378
				0		378
				0		378
				0		378
				0		378
				0		378
				0		378
				0		378
				0		378
				0		378
				0		378
				0		378
				0		378
				0		378
				0		378
				0		378
				0		378
				0		378
				0		378
				0		378
				0		378
				0		378
				0		378
				0		378
				0		378
				0		378
				0		378
				0		378
				0		378
				0		378
				0		378
				0		378
				0		378
				0		378
				0		378
				0		378
				0		378
				0		378
				0		378
				0		378
				0		378
				0		378
				0		378
				0		378
				0		378
				0		378
				0		378
				0		378
				0		378
				0		378
				0		378
				0		378
				0		378
				0		378
				0		378
				0		378
				0		378
				0		378
				0		378
				0		378
				0		378
				0		378
				0		378
				0		378
				0		378
				0		378
				0		378
				0		378
				0		378
				0		378
				0		378
				0		378
				0		378
				0		378
				0		378
				0		378
				0		378
				0		378
				0		378
				0		378
				0		378
				0		378
				0		378
				0		378
				0		378
				0		378
				0		378
				0		378
				0		378
				0		378
				0		378
				0		378
				0		378
				0		378
				0		378
				0		378
				0		378
				0		378
				0		378
				0		378
				0		378
				0		378
				0		378
				0		378
				0		378
				0		378
				0		378
				0		378
				0		378
				0		378
				0		378
				0		378
				0		378
				0		378
				0		378
				0		378
				0		378
				0		378
				0		378
				0		378
				0		378
				0		378
				0		378
				0		378
				0		378
				0		378
				0		378
				0		378
				0		378
				0		378
				0		378
				0		378
				0		378
				0		378
				0		378
				0		378
				0		378
				0		378
				0		378
				0		378
				0		378
				0		378
				0		378
				0		378
				0		378
				0		378
				0		378
				0		378
				0		378
				0		378
				0		378
				0		378
				0		378
				0		378
				0		378
				0		378
				0		378
				0		378
				0		378
				0		378
				0		378
				0		378
				0		378
				0		378
				0		378
				0		378
				0		378
				0		378
				0		378
				0		378
				0		378
				0		378
				0		378
				0		378
				0		378
				0		378
				0		378
				0		378
				0		378
				0		378
				0		378
				0		378
				0		378
				0		378
				0		378
				0		378
				0		378
				0		378
				0		378
				0		378
				0		378
				0		378
				0		378
				0		378
				0		378
				0		378
				0		378
				0		378
				0		378
				0		378
				0		378
				0		378
				0		378
				0		378
				0		378
				0		378
				0		378
				0		378
				0		378
				0		378
				0		378
				0		378
				0		378
				0		378
				0		378
				0		378
				0		378
				0		378
				0		378
				0		378
				0		378
				0		378
				0		378
				0		378
				0		378
				0		378
				0		378
				0		378
				0		378
				0		378
				0		378
				0		378
				0		378
				0		378
				0		378
				0		378
				0		378
				0		378
				0		378
				0		378
				0		378
				0		378
				0		378
				0		378
				0		378
				0		378
				0		378
				0		378
				0		378
				0		378
				0		378
				0		378
				0		378
				0		378
				0		378
				0		378
				0		378
				0		378
				0		378
				0		378
				0		378
				0		378
				0		378
				0		378
				0		378
				0		378
				0		378
				0		378
				0		378
				0		378
				0		378
				0		378
				0		378
				0		378
				0		378
				0		378
				0		378
				0		378
				0		378
				0		378
				0		378
				0		378
				0		378
				0		378
				0		378
				0		378
				0		378
				0		378
				0		378
				0		378
				0		378
				0		378
				0		378
				0		378
				0		378
				0		378
				0		378
				0		378
				0		378
				0		378
				0		378
				0		378
				0		378
				0		378
				0		378
				0		378
				0		378
				0		378
				0		378
				0		378
				0		378
				0		378
				0		378
				0		378
				0		378
				0		378
				0		378
				0		378
				0		378
				0		378
				0		378
				0		378
				0		378
				0		378
				0		378
				0		378
				0		378
				0		378
				0		378
				0		378
				0		378
				0		378
				0		378
				0		378
				0		378
				0		378
				0		378
				0		378
				0		378
				0		378
				0		378
				0		378
				0		378
				0		378
				0		378
				0		378
				0		378
				0		378
				0		378
				0		378
				0		378
				0		378
				0		378
				0		378
				0		378
				0		378
				0		378
				0		378
				0		378
				0		378
				0		378
				0		378
				0		378
				0		378
				0		378
				0		378
				0		378
				0		378
				0		378
				0		378
				0		378
				0		378
				0		378
				0		378
				0		378
				0		378
				0		378
				0		378
				0		378
				0		378
				0		378
				0		378
				0		378
				0		378
				0		378
				0		378
				0		378
				0		378
				0		378
				0		378
				0		378
				0		378
				0		378
				0		378
				0		378
				0		378
				0		378
				0		378
				0		378
				0		378
				0		378
				0		378
				0		378
				0		378
				0		378
				0		378
				0		378
				0		378
				0		378
				0		378
				0		378
				0		378
				0		378
				0		378
				0		378
				0		378
				0		378
				0		378
				0		378
				0		378
				0		378
				0		378
				0		378
				0		378
				0		378
				0		378
				0		378
				0		378
				0		378
				0		378
				0		378
				0		378
				0		378
				0		378
				0		378
				0		378
				0		378
				0		378
				0		378
				0		378
				0		378
				0		378
				0		378
				0		378
				0		378
				0		378
				0		378
				0		378
				0		378
				0		378
				0		378
				0		378
				0		378
				0		378
				0		378
				0		378
				0		378
				0		378
				0		378
				0		378
				0		378
				0		378
				0		378
				0		378
				0		378
				0		378
				0		378
				0		378
				0		378
				0		378
				0		378
				0		378
				0		378
				0		378
				0		378
				0		378
				0		378
				0		378
				0		378
				0		378
				0		378
				0		378
				0		378
				0		378
				0		378
				0		378
				0		378
				0		378
				0		378
				0		378
				0		378
				0		378
				0		378
				0		378
				0		378
				0		378
				0		378
				0		378
				0		378
				0		378
				0		378
				0		378
				0		378
				0		378
				0		378
				0		378
				0		378
				0		378
				0		378
				0		378
				0		378
				0		378
				0		378
				0		378
				0		378
				0		378
				0		378
				0		378
				0		378
				0		378
				0		378
				0		378
				0		378
				0		378
				0		378
				0		378
				0		378
				0		378
				0		378
				0		378
				0		378
				0		378
				0		378
				0		378
				0		378
				0		378
				0		378
				0		378
				0		378
				0		378
				0		378
				0		378
				0		378
				0		378
				0		378
				0		378
				0		378
				0		378
				0		378
				0		378
				0		378
				0		378
				0		378
				0		378
				0		378
				0		378
				0		378
				0		378
				0		378
				0		378
				0		378
				0		378
				0		378
				0		378
				0		378
				0		378
				0		378
				0		378
				0		378
				0		378
				0		378
				0		378
				0		378
				0		378
				0		378
				0		378
				0		378
				0		378
				0		378
				0		378
				0		378
				0		378
				0		378
				0		378
				0		378
				0		378
				0		378
				0		378
				0		378
				0		378
				0		378
				0		378
				0		378
				0		378
				0		378
				0		378
				0		378
				0		378
				0		378
				0		378
				0		378
				0		378
				0		378
				0		378
				0		378
				0		378
				0		378
				0		378
				0		378
				0		378
				0		378
				0		378
				0		378
				0		378
				0		378
				0		378
				0		378
				0		378
				0		378
				0		378
				0		378
				0		378
				0		378
				0		378
				0		378
				0		378
				0		378
				0		378
				0		378
				0		378
				0		378
				0		378
				0		378
				0		378
				0		378
				0		378
				0		378
				0		378
				0		378
				0		378
				0		378
				0		378
				0		378
				0		378
				0		378
				0		378
				0		378
				0		378
				0		378
				0		378
				0		378
				0		378
				0		378
				0		378
				0		378
				0		378
				0		378
				0		378
				0		378
				0		378
				0		378
				0		378
				0		378
				0		378
				0		378
				0		378
				0		378
				0		378
				0		378
				0		378
				0		378
				0		378
				0		378
				0		378
				0		378
				0		378
				0		378
				0		378
				0		378
				0		378
				0		378
				0		378
				0		378
				0		378
				0		378
				0		378
				0		378
				0		378
				0		378
				0		378
				0		378
				0		378
				0		378
				0		378
				0		378
				0		378
				0		378
				0		378
				0		378
				0		378
				0		378
				0		378
				0		378
				0		378
				0		378
				0		378
				0		378
				0		378
				0		378
				0		378
				0		378
				0		378
				0		378
				0		378
				0		378
				0		378
				0		378
				0		378
				0		378
				0		378
				0		378
				0		378
				0		378
				0		378
				0		378
				0		378
				0		378
				0		378
				0		378
				0		378
				0		378
				0		378
				0		378
				0		378
				0		378
				0		378
				0		378
				0		378
				0		378
				0		378
				0		378
				0		378
				0		378
				0		378
				0		378
				0		378
				0		378
				0		378
				0		378
				0		378
				0		378
				0		378
				0		378
				0		378
				0		378
				0		378
				0		378
				0		378
				0		378
				0		378
				0		378
				0		378
				0		378
				0		378
				0		378
				0		378
				0		378
				0		378
				0		378
				0		378
				0		378
				0		378
				0		378
				0		378
				0		378
				0		378
				0		378
				0		378
				0		378
				0		378
				0		378
				0		378
				0		378
				0		378
				0		378
				0		378
				0		378
				0		378
				0		378
				0		378
				0		378
				0		378
				0		378
				0		378
				0		378
				0		378
				0		378
				0		378
				0		378
				0		378
				0		378
				0		378
				0		378
				0		378
				0		378
				0		378
				0		378
				0		378
				0		378
				0		378
				0		378
				0		378
				0		378
				0		378
				0		378
				0		378
				0		378
				0		378
				0		378
				0		378
				0		378
				0		378
				0		378
				0		378
				0		378
				0		378
				0		378
				0		378
				0		378
				0		378
				0		378
				0		378
				0		378
				0		378
				0		378
				0		378
				0		378
				0		378
				0		378
				0		378
				0		378
				0		378
				0		378
				0		378
				0		378
				0		378
				0		378
				0		378
				0		378
				0		378
				0		378
				0		378
				0		378
				0		378
				0		378
				0		378
				0		378
				0		378
				0		378
				0		378
				0		378
				0		378
				0		378
				0		378
				0		378
				0		378
				0		378
				0		378
				0		378
				0		378
				0		378
				0		378
				0		378
				0		378
				0		378
				0		378
				0		378
				0		378
				0		378
				0		378
				0		378
				0		378
				0		378
				0		378
				0		378
				0		378
				0		378
				0		378
				0		378
				0		378
				0		378
				0		378
				0		378
				0		378
				0		378
				0		378
				0		378
				0		378
				0		378
				0		378
				0		378
				0		378
				0		378
				0		378
				0		378
				0		378
				0		378
				0		378
				0		378
				0		378
				0		378
				0		378
				0		378
				0		378
				0		378
				0		378
				0		378
				0		378
				0		378
				0		378
				0		378
				0		378
				0		378
				0		378
				0		378
				0		378
				0		378
				0		378
				0		378
				0		378
				0		378
				0		378
				0		378
				0		378
				0		378
				0		378
				0		378
				0		378
				0		378
				0		378
				0		378
				0		378
				0		378
				0		378
				0		378
				0		378
				0		378
				0		378
				0		378
				0		378
				0		378
				0		378
				0		378
				0		378
				0		378
				0		378
				0		378
				0		378
				0		378
				0		378
				0		378
				0		378
				0		378
				0		378
				0		378
				0		378
				0		378
				0		378
				0		378
				0		378
				0		378
				0		378
				0		378
				0		378
				0		378
				0		378
				0		378
				0		378
				0		378
				0		378
				0		378
				0		378
				0		378
				0		378
				0		378
				0		378
				0		378
				0		378
				0		378
				0		378
				0		378
				0		378
				0		378
				0		378
				0		378
				0		378
				0		378
				0		378
				0		378
				0		378
				0		378
				0		378
				0		378
				0		378
				0		378
				0		378
				0		378
				0		378
				0		378
				0		378
				0		378
				0		378
				0		378
				0		378
				0		378
				0		378
				0		378
				0		378
				0		378
				0		378
				0		378
				0		378
				0		378
				0		378
				0		378
				0		378
				0		378
				0		378
				0		378
				0		378
				0		378
				0		378
				0		378
				0		378
				0		378
				0		378
				0		378
				0		378
				0		378
				0		378
				0		378
				0		378
				0		378
				0		378
				0		378
				0		378
				0		378
				0		378
				0		378
				0		378
				0		378
				0		378
				0		378
				0		378
				0		378
				0		378
				0		378
				0		378
				0		378
				0		378
				0		378
				0		378
				0		378
				0		378
				0		378
				0		378
				0		378
				0		378
				0		378
				0		378
				0		378
				0		378
				0		378
				0		378
				0		378
				0		378
				0		378
				0		378
				0		378
				0		378
				0		378
				0		378
				0		378
				0		378
				0		378
				0		378
				0		378
				0		378
				0		378
				0		378
				0		378
				0		378
				0		378
				0		378
				0		378
				0		378
				0		378
				0		378
				0		378
				0		378
				0		378
				0		378
				0		378
				0		378
				0		378
				0		378
				0		378
				0		378
				0		378
				0		378
				0		378
				0		378
				0		378
				0		378
				0		378
				0		378
				0		378
				0		378
				0		378
				0		378
				0		378
				0		378
				0		378
				0		378
				0		378
				0		378
				0		378
				0		378
				0		378
				0		378
				0		378
				0		378
				0		378
				0		378
				0		378
				0		378
				0		378
				0		378
				0		378
				0		378
				0		378
				0		378
				0		378
				0		378
				0		378
				0		378
				0		378
				0		378
				0		378
				0		378
				0		378
				0		378
				0		378
				0		378
				0		378
				0		378
				0		378
				0		378
				0		378
				0		378
				0		378
				0		378
				0		378
				0		378
				0		378
				0		378
				0		378
				0		378
				0		378
				0		378
				0		378
				0		378
				0		378
				0		378
				0		378
				0		378
				0		378
				0		378
				0		378
				0		378
				0		378
				0		378
				0		378
				0		378
				0		378
				0		378
				0		378
				0		378
				0		378
				0		378
				0		378
				0		378
				0		378
				0		378
				0		378
				0		378
				0		378
				0		378
				0		378
				0		378
				0		378
				0		378
				0		378
				0		378
				0		378
				0		378
				0		378
				0		378
				0		378
				0		378
				0		378
				0		378
				0		378
				0		378
				0		378
				0		378
				0		378
				0		378
				0		378
				0		378
				0		378
				0		378
				0		378
				0		378
				0		378
				0		378
				0		378
				0		378
				0		378
				0		378
				0		378
				0		378
				0		378
				0		378
				0		378
				0		378
				0		378
				0		378
				0		378
				0		378
				0		378
				0		378
				0		378
				0		378
				0		378
				0		378
				0		378
				0		378
				0		378
				0		378
				0		378
				0		378
				0		378
				0		378
				0		378
				0		378
				0		378
				0		378
				0		378
				0		378
				0		378
				0		378
				0		378
				0		378
				0		378
				0		378
				0		378
				0		378
				0		378
				0		378
				0		378
				0		378
				0		378
				0		378
				0		378
				0		378
				0		378
				0		378
				0		378
				0		378
				0		378
				0		378
				0		378
				0		378
				0		378
				0		378
				0		378
				0		378
				0		378
				0		378
				0		378
				0		378
				0		378
				0		378
				0		378
				0		378
				0		378
				0		378
				0		378
				0		378
				0		378
				0		378
				0		378
				0		378
				0		378
				0		378
				0		378
				0		378
				0		378
				0		378
				0		378
				0		378
				0		378
				0		378
				0		378
				0		378
				0		378
				0		378
				0		378
				0		378
				0		378
				0		378
				0		378
				0		378
				0		378
				0		378
				0		378
				0		378
				0		378
				0		378
				0		378
				0		378
				0		378
				0		378
				0		378
				0		378
				0		378
				0		378
				0		378
				0		378
				0		378
				0		378
				0		378
				0		378
				0		378
				0		378
				0		378
				0		378
				0		378
				0		378
				0		378
				0		378
				0		378
				0		378
				0		378
				0		378
				0		378
				0		378
				0		378
				0		378
				0		378
				0		378
				0		378
				0		378
				0		378
				0		378
				0		378
				0		378
				0		378
				0		378
				0		378
				0		378
				0		378
				0		378
				0		378
				0		378
				0		378
				0		378
				0		378
				0		378
				0		378
				0		378
				0		378
				0		378
				0		378
				0		378
				0		378
				0		378
				0		378
				0		378
				0		378
				0		378
				0		378
				0		378
				0		378
				0		378
				0		378
				0		378
				0		378
				0		378
				0		378
				0		378
				0		378
				0		378
				0		378
				0		378
				0		378
				0		378
				0		378
				0		378
				0		378
				0		378
				0		378
				0		378
				0		378
				0		378
				0		378
				0		378
				0		378
				0		378
				0		378
				0		378
				0		378
				0		378
				0		378
				0		378
				0		378
				0		378
				0		378
				0		378
				0		378
				0		378
				0		378
				0		378
				0		378
				0		378
				0		378
				0		378
				0		378
				0		378
				0		378
				0		378
				0		378
				0		378
				0		378
				0		378
				0		378
				0		378
				0		378
				0		378
				0		378
				0		378
				0		378
				0		378
				0		378
				0		378
				0		378
				0		378
				0		378
				0		378
				0		378
				0		378
				0		378
				0		378
				0		378
				0		378
				0		378
				0		378
				0		378
				0		378
				0		378
				0		378
				0		378
				0		378
				0		378
				0		378
				0		378
				0		378
				0		378
				0		378
				0		378
				0		378
				0		378
				0		378
				0		378
				0		378
				0		378
				0		378
				0		378
				0		378
				0		378
				0		378
				0		378
				0		378
				0		378
				0		378
				0		378
				0		378
				0		378
				0		378
				0		378
				0		378
				0		378
				0		378
				0		378
				0		378
				0		378
				0		378
				0		378
				0		378
				0		378
				0		378
				0		378
				0		378
				0		378
				0		378
				0		378
				0		378
				0		378
				0		378
				0		378
				0		378
				0		378
				0		378
				0		378
				0		378
				0		378
				0		378
				0		378
				0		378
				0		378
				0		378
				0		378
				0		378
				0		378
				0		378
				0		378
				0		378
				0		378
				0		378
				0		378
				0		378
				0		378
				0		378
				0		378
				0		378
				0		378
				0		378
				0		378
				0		378
				0		378
				0		378
				0		378
				0		378
				0		378
				0		378
				0		378
				0		378
				0		378
				0		378
				0		378
				0		378
				0		378
				0		378
				0		378
				0		378
				0		378
				0		378
				0		378
				0		378
				0		378
				0		378
				0		378
				0		378
				0		378
				0		378
				0		378
				0		378
				0		378
				0		378
				0		378
				0		378
				0		378
				0		378
				0		378
				0		378
				0		378
				0		378
				0		378
				0		378
				0		378
				0		378
				0		378
				0		378
				0		378
				0		378
[truncated: 1 more rows]
