# Supplementary material
Source: Research Square preprint supplement (doi:10.21203/rs.3.rs-9069496/v1)
Supplement: Supplementary file 1 [file 381de7de58ad1b9fdca126e0.doc]

|  | **perimeter（km）** | **Area（km2）** | **Long axis（km）** | **Short axis（km）** | **Length to width ratio** | **Distance from breach(km)** |
| --- | --- | --- | --- | --- | --- | --- |
| **Bar-1** | 8.98 | 1.51 | 4.45 | 0.55 | 8.09 | 0 |
| **Bar-2** | 5.12 | 0.79 | 2.47 | 0.64 | 3.86 | 2.91 |
| **Bar-3** | 2.70 | 0.31 | 1.2 | 0.37 | 3.24 | 4.46 |
| **Bar-4** | 4.22 | 0.23 | 2.0 | 0.24 | 8.33 | 5.38 |
| **Bar-5** | 4.79 | 0.56 | 2.51 | 0.32 | 7.84 | 5.84 |
| **Bar-6** | 2.44 | 0.18 | 1.35 | 0.30 | 4.50 | 7.87 |
| **Bar7** | 4.68 | 0.58 | 2.56 | 0.43 | 5.95 | 8.81 |
| **Bar-8** | 3.99 | 0.17 | 2.0 | 0.17 | 11.76 | 10.98 |
| **Bar-9** | 2.75 | 0.12 | 1.37 | 0.14 | 9.79 | 12.12 |
| **Bar10** | 1.99 | 0.056 | 1.1 | 0.15 | 7.33 | 13.11 |
| **Bar-11** | 3.00 | 0.16 | 1.61 | 0.14 | 11.50 | 13.68 |
| **Bar-12** | 0.76 | 0.011 | 0.41 | 0.06 | 6.83 | 15.39 |
| **Bar-13** | 1.00 | 0.032 | 0.5 | 0.1 | 5.00 | 15.68 |
| **Bar14** | 2.37 | 0.057 | 1.21 | 0.08 | 15.13 | 16.02 |
| **Bar-15** | 0.96 | 0.019 | 0.46 | 0.06 | 7.67 | 16.42 |
| **Bar-16** | 2.44 | 0.10 | 1.19 | 0.13 | 9.15 | 17.14 |
