# Supplementary material
Source: Research Square preprint supplement (doi:10.21203/rs.3.rs-9069496/v1)
Supplement: Supplementary file 2 [file f681802527000292288fd3d5.doc]

| Bars | Long axis of the maximum boulder（m） |
| --- | --- |
| Bar-1 | 17.88 |
| Bar-2 | 20.93 |
| Bar-3 | 15.61 |
| Bar-4 | 10.62 |
| Bar-5 | 11.81 |
| Bar-6 | 8.53 |
| Bar-7 | 13.31 |
| Bar-8 | 12.18 |
| Bar-9 | 10.42 |
| Bar-10 | 13.15 |
| Bar-11 | 8.44 |
| Bar-12 | 10.19 |
| Bar-13 | 5.08 |
| Bar-14 | 10.91 |
| Bar-15 | 6.95 |
| Bar-16 | 8.41 |
